# Supplementary material
Source: PubMed Central journal article supplement (PMC5350565)
Supplement: EMBJ-36-797-s001.pdf [file EMBJ-36-797-s001.pdf]

# Appendix

**Ben-Kasus Nissim et al “Mitochondria control store-operated Ca<sup>2+</sup> entry through Na<sup>+</sup> and redox signals”**

## Table of Contents

Appendix Figure S1 – Effects of MCU Knockdown on mitochondrial Ca<sup>2+</sup> transients, SOCE and CRAC in HEK293T cells.

Appendix Figure S2 – Ouabain treatment triggers a cytosolic Na<sup>+</sup> rise.

Appendix Figure S3 – CoroNa red and Mito Track Green colocalized in HEK293T cells.

# Appendix Figure S1.

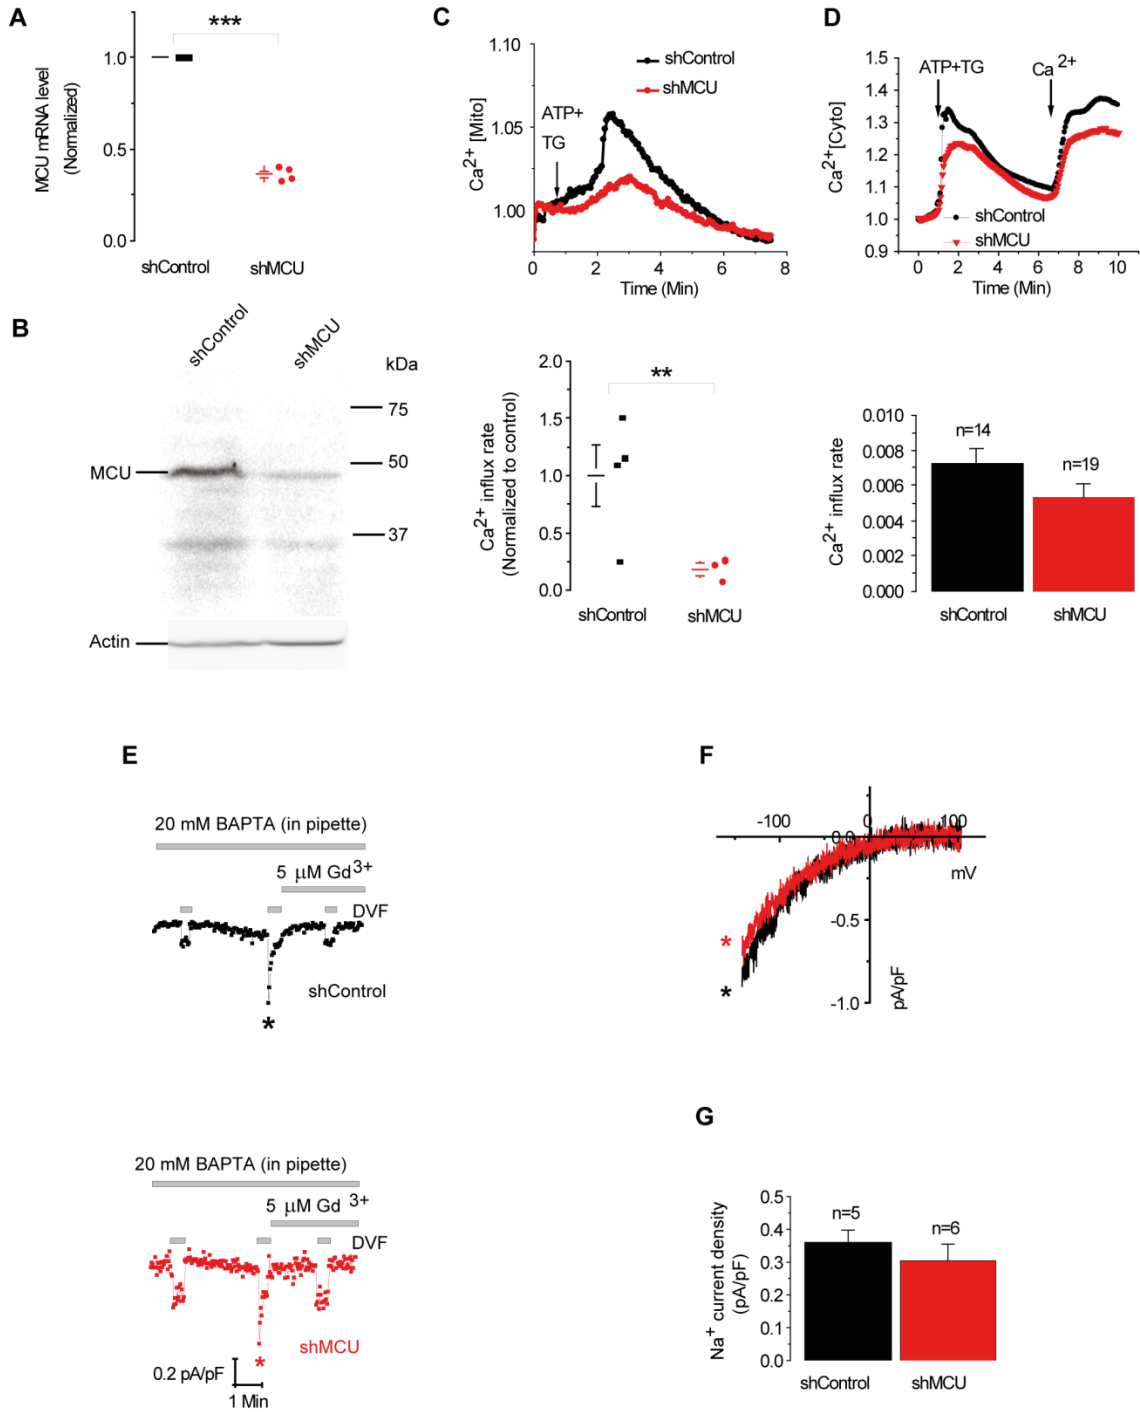

**Appendix Figure S2.**

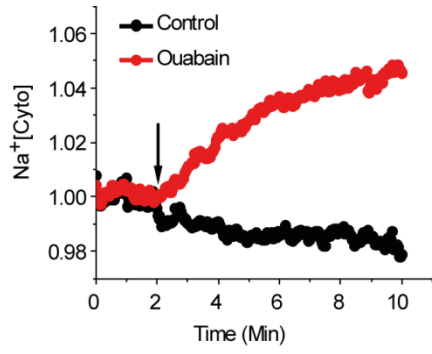

**Appendix Figure S3.**

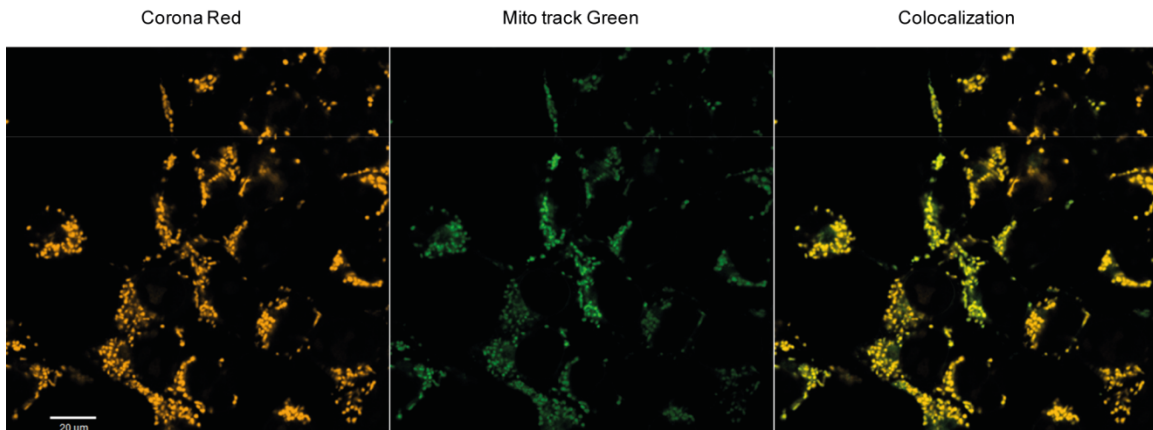

### Legends for Appendix Figures:

**Appendix Figure S1. Effects of MCU Knockdown on mitochondrial  $\text{Ca}^{2+}$  transients, SOCE and CRAC in HEK293T cells.** (A) Real-time PCR of MCU in shControl and shMCU treated cells. (B) Immunoblot of MCU in cells transfected with shMCU or shControl. (C) Rate of mitochondrial  $\text{Ca}^{2+}$  transients in shControl or shMCU treated cells expressing the mitochondrial  $\text{Ca}^{2+}$  sensor RP-mt. ATP and TG were added where indicated by the arrow. (C, upper panel), representative mitochondrial  $\text{Ca}^{2+}$  trace. (C, lower panel), rates of mitochondrial  $\text{Ca}^{2+}$  influx from several independent experiments. (D, upper panel), traces of cytosolic SOCE  $\text{Ca}^{2+}$  responses in HEK293T cells transfected with shMCU (red) vs. shControl (black) and loaded with Fura-2. Cells were treated as described in Fig 1B. (D, lower panel), averaged rates of  $\text{Ca}^{2+}$  rise in cells silenced MCU (n=19) vs. shControl transfected cells (n=14). (E) Electrophysiological recordings were performed on HEK293T cells transfected with shControl (black, upper panel) or shMCU (red, lower panel) and CRAC currents development are taken at -100 mV. (F), Representative I-V relationships of monovalent CRAC currents are taken from traces in (E) where indicated by color coded asterisks. (G), Statistical analysis on monovalent CRAC currents measured at -100 mV. \*\*, p<0.01 \*\*\*, p<1E-03.

**Appendix Figure S2. Ouabain treatment triggers a cytosolic  $\text{Na}^+$  rise.** HEK293T cells were loaded with the cytosolic  $\text{Na}^+$  probe, Asante Natrium green. Then after, cells were superfused with  $\text{Na}^+$  containing ringer solution (control) or with the same ringer containing Ouabain (100  $\mu\text{M}$ ). Ouabain is added where indicated by the arrow. Cells treated with Ouabain show a rise in cytosolic  $\text{Na}^+$ .

**Appendix Figure S3. CoroNa red and Mito Track Green colocalized in HEK293T cells.** Cells were double stained with CoroNa red (1  $\mu\text{M}$ ) and Mito Track green (100 nM). Colocalization was shown using confocal microscopy. The scale bar represents 20  $\mu\text{m}$ .
