# Supplementary material
Source: PubMed Central journal article supplement (PMC5350565)
Supplement: EMBJ-36-797-s002.pdf [file EMBJ-36-797-s002.pdf]

## Expanded View Figures

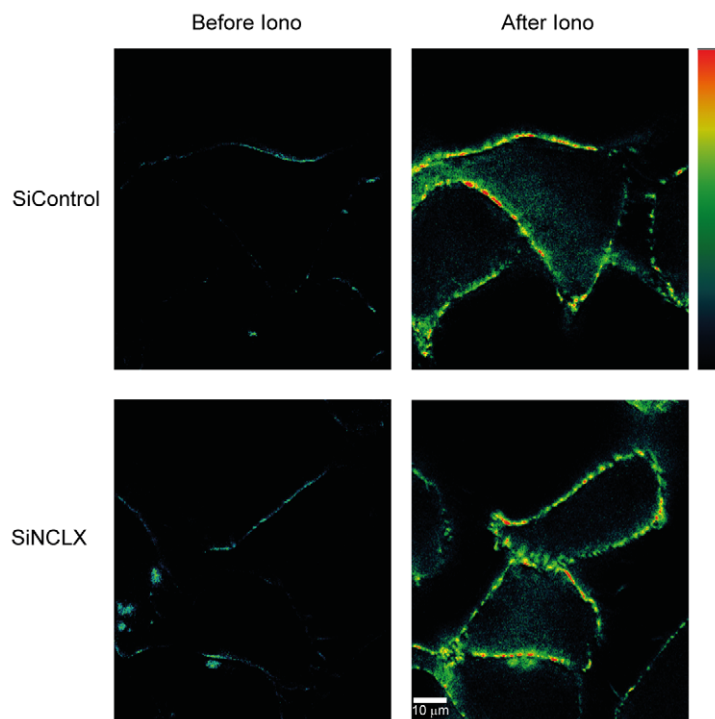

**Figure EV1. NCLX knockdown has no effect on Orai1/STIM1 interactions measured with FRET.** HEK293T cells expressing Orai1-CFP and STIM1-YFP were transfected with either control siRNA or NCLX siRNA and effect on Orai1/STIM1 corrected FRET after store depletion with 2.5 µM ionomycin (Iono) were compared. Bar scale: warmer colors indicate high FRET. The scale bar represents 10 µm.

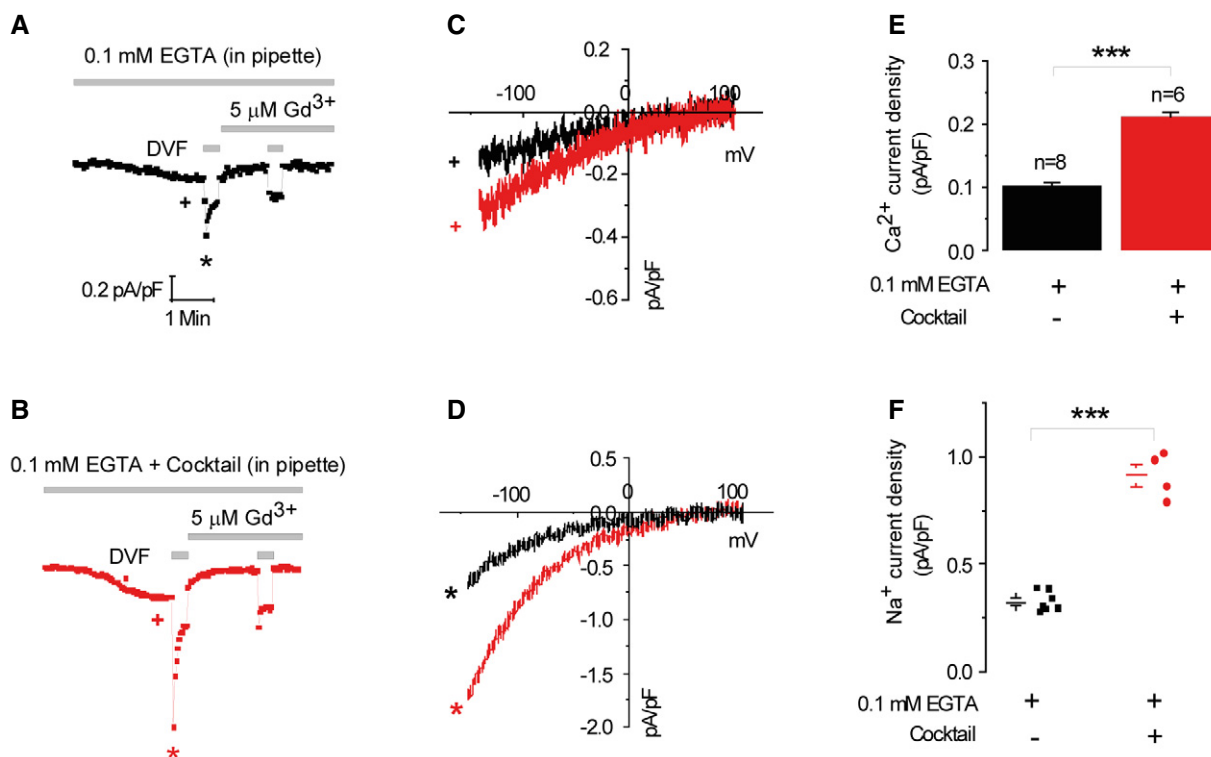

**Figure EV2. CRAC channels are enhanced under physiological conditions of energized mitochondria.**

A, B Electrophysiological CRAC recordings were performed on HEK293T cells where store depletion was induced by the use of a pipette solution containing 0.1 mM EGTA with IP<sub>3</sub> with (B) and without (A) inclusion of a cocktail to energize the mitochondria. At the end of recordings, 5  $\mu$ M Gd<sup>3+</sup> was used to inhibit CRAC currents. C, D Representative I–V relationships of Ca<sup>2+</sup> (C) and Na<sup>+</sup> (D) CRAC in are taken from traces in (A) and (B) where indicated by color-coded asterisks. E, F Statistical analysis on Ca<sup>2+</sup> and Na<sup>+</sup> CRAC currents measured at –100 mV.

Data information: The results are presented as the means  $\pm$  SEM. \*\*\* $P < 1E-03$ .  $P$ -values indicate the results of an unpaired Student's  $t$ -test.

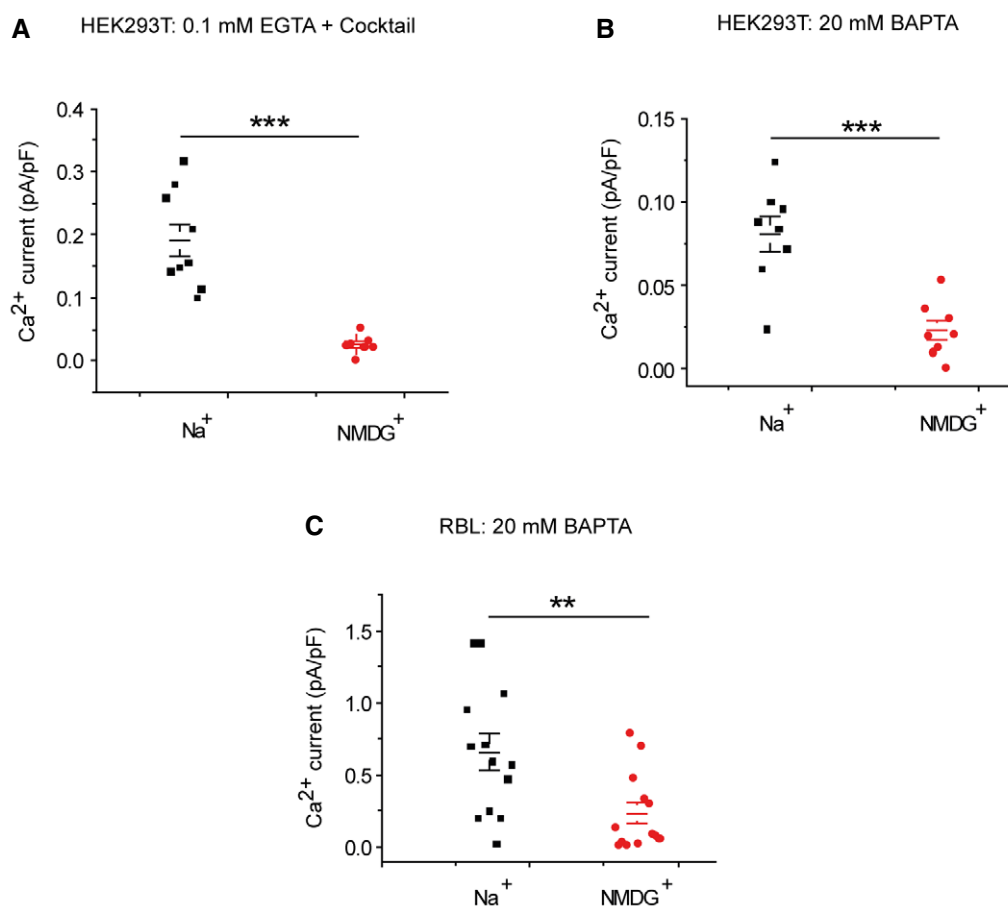

**Figure EV3. Substitution of  $\text{Na}^+$  by  $\text{NMDG}^+$  inhibits CRAC currents in HEK293T and RBL cells.**

A–C Scatter plots representing  $\text{Ca}^{2+}$  CRAC currents activated either by dialysis through the patch pipette of a solution containing either 0.1 mM EGTA+IP<sub>3</sub> (A) or 20 mM BAPTA (B) in HEK293T cells, or in RBL cells activated by dialysis of a solution containing 20 mM BAPTA (C). *P*-values (A–C) indicate the results of an unpaired student's *t*-test.

Data information: The results are presented as the means  $\pm$  SEM.  $**P < 0.01$   $***P < 1E-03$ . *P*-values indicate the results of an unpaired Student's *t*-test.

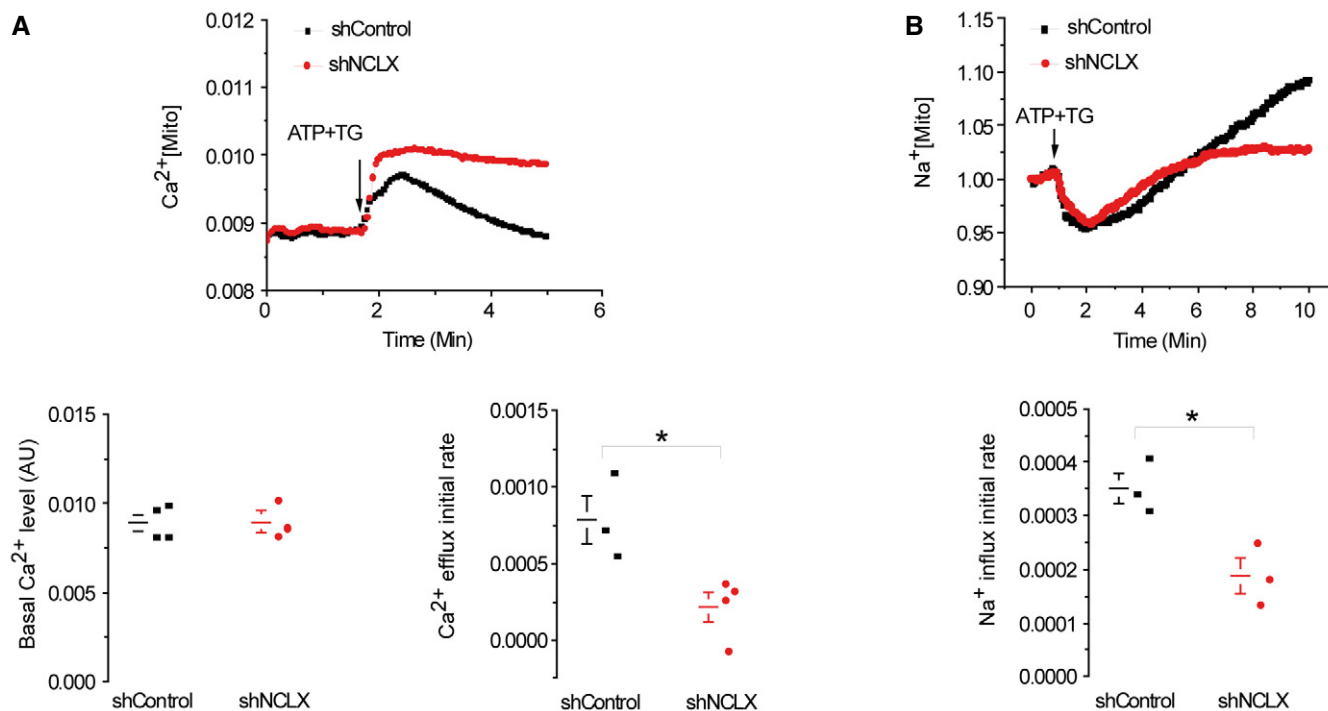

**Figure EV4. Knockdown of NCLX expression inhibits mitochondrial Ca<sup>2+</sup> efflux and Na<sup>+</sup> uptake.**

**A** Upper panel: Mitochondrial Ca<sup>2+</sup> was monitored in cells expressing the mitochondrial Ca<sup>2+</sup> sensor RP-mt. Mitochondrial Ca<sup>2+</sup> transient was evoked by application of ATP and TG, added when indicated. Lower right panel: Rates of mitochondrial Ca<sup>2+</sup> efflux derived from the upper panel. Lower left panel: The basal Ca<sup>2+</sup> level (arbitrary units, AU) of shControl ( $n = 3$ ) versus shNCLX ( $n = 4$ ).

**B** Upper panel: Mitochondrial Na<sup>+</sup> uptake in HEK293T cells preloaded with the mitochondrial Na<sup>+</sup> sensor, CoroNa red. Na<sup>+</sup> signals were evoked by ATP and TG added when indicated. Lower panel: Rates of mitochondrial Na<sup>+</sup> influx derived from the upper panel.

Data information: The results are presented as the means  $\pm$  SEM. \* $P < 0.05$ .  $P$ -values indicate the results of an unpaired Student's  $t$ -test.

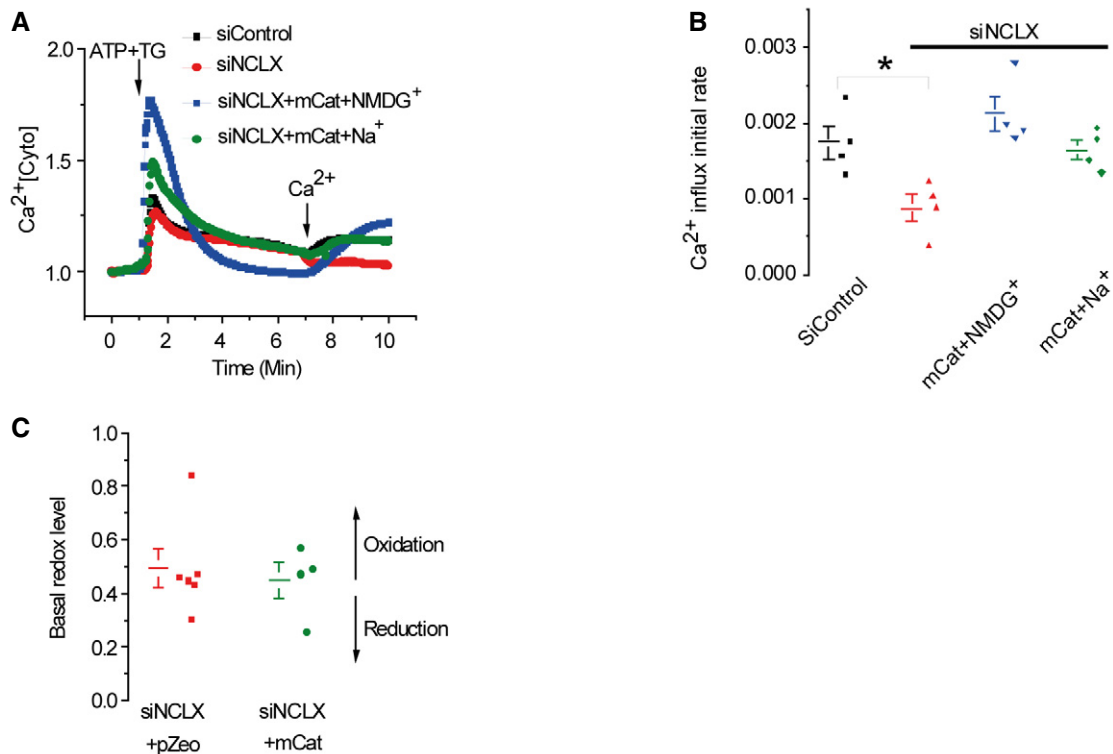

**Figure EV5. Na<sup>+</sup> has no effect on SOCE in the presence of m-catalase.**

A HEK293T cells were transfected with either siControl or siNCLX with or without m-catalase. Cytosolic Ca<sup>2+</sup> responses were monitored in HEK293T cells after store depletion by ATP and TG as in Fig 1B in the presence or absence of Na<sup>+</sup> ions.

B, C Averaged rates (means ± SEM) of Ca<sup>2+</sup> influx in either siControl cells (n = 4), siNCLX (n = 4), siNCLX+m-catalase with Ringer containing Na<sup>+</sup> (n = 4), or NMDG<sup>+</sup> (n = 4) are shown in (B). P-values indicate the results of a one-way ANOVA test followed by Tukey *post hoc* analysis. \*P < 0.05. The basal redox levels of siNCLX+pZeo cells (n = 6) versus siNCLX+m-catalase (n = 4) are shown in (C).
