# Supplementary material
Source: PubMed Central journal article supplement (PMC5350565)

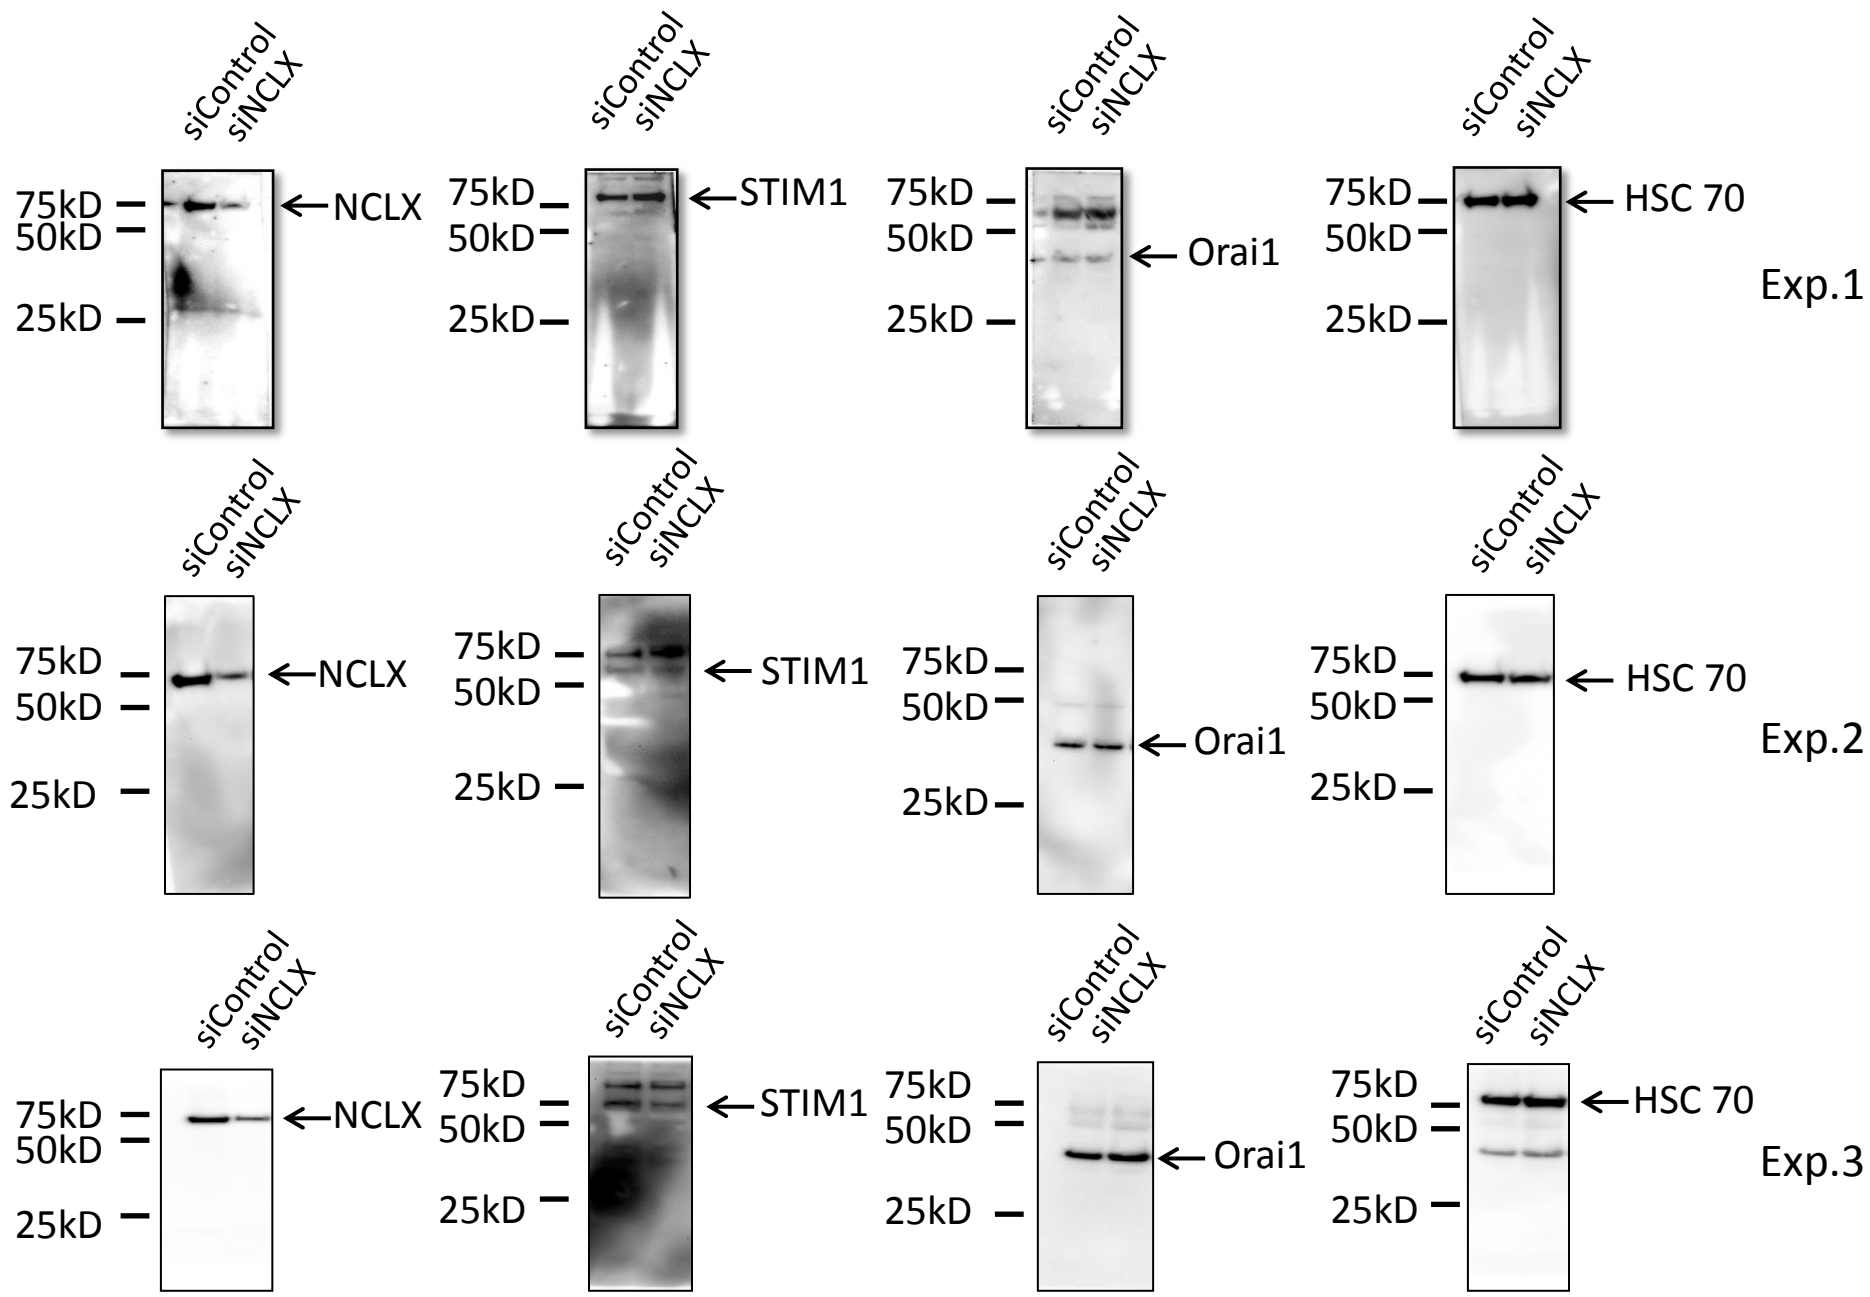

Supplement: EMBJ-36-797-s005.pdf [file EMBJ-36-797-s005.pdf]
